# Supplementary material for: Oxidative dehydrogenation of a new tetra-amine N4-donor macrocycle tunes the nickel(ii) spin state from high spin to low spin
Source: Royal Society of Chemistry journal article supplement (doi:10.1039/c3dt51776d), 2013-01-01
Supplement: c3dt51776d.pdf [file c3dt51776d.pdf]

**Electronic Supplementary Information for**

**Oxidative dehydrogenation of a tetra-amine N<sub>4</sub> macrocycle tunes  
the nickel(II) spin state**

Rajni K. Wilson and Sally Brooker\*<sup>[a]</sup>

<sup>[a]</sup> *Department of Chemistry and MacDiarmid Institute for Advanced Materials and Nanotechnology,  
University of Otago, PO Box 56, Dunedin 9054, New Zealand. Fax: +64 3 479 7906. Email:  
[sbrooker@chemistry.otago.ac.nz](mailto:sbrooker@chemistry.otago.ac.nz)*

## Experimental

Elemental analyses were carried out by the Campbell Microanalytical Laboratory at the University of Otago. Infrared spectra were obtained on a Bruker Alpha FT-ATR IR spectrometer with a diamond anvil Alpha-P module. MS spectra were collected on a Bruker MicrOTOF<sub>Q</sub> spectrometer. UV-vis spectra were obtained on a Varian 500 Scan UV-vis-NIR spectrophotometer. Magnetic data were recorded using a Quantum Design Physical Property Measurement PPMS magnetometer with an applied field of 1 T, for all of the nickel(II) complexes, except for [Ni<sup>II</sup>L<sup>ia</sup>](BF<sub>4</sub>)•H<sub>2</sub>O•DCM for which data was recorded using a Johnson-Matthey magnetic susceptibility balance MSB-MKI. All magnetic data were corrected for diamagnetic contributions using Pascal's constants.

<sup>1</sup>H and <sup>13</sup>C NMR spectra were recorded at 25 °C on a Varian 500 MHz Inova spectrometer. The assignments are based on the atom labelling scheme used in the X-ray crystal structures.

All Evans method experiments were recorded on the Varian 500 MHz NMR spectrometer (i.e.  $f = 500 \times 10^6$  Hz) with CD<sub>3</sub>CN as the solvent (contains TMS). All samples were prepared with a precisely known mass dissolved in a volume of 0.7 mL of CD<sub>3</sub>CN. A special double walled NMR tube was used. A sample of pure CD<sub>3</sub>CN was placed in the inner tube while the paramagnetic sample in CD<sub>3</sub>CN was placed in the outer tube. The resulting NMR spectrum exhibits two peaks near 2 ppm: one is due to the pure CD<sub>3</sub>CN in the inner tube (which occurs at 969.36 Hz) and the other is due to the paramagnetically shifted CD<sub>3</sub>CN signal from the outer tube. The chemical shift of these two peaks was determined and the separation between them ( $\Delta f$ ) measured in hertz. The following equation<sup>1</sup> was then used to calculate the gram susceptibility  $\chi_g$ , which was then converted in the usual manner to the molar susceptibility,  $\chi_m$ .

$$\chi_g = \frac{3\Delta f}{2\pi f m} + \chi_0$$

Where  $\chi_0 = -0.534 \times 10^{-6}$  cgs/gram, the gram susceptibility of pure CD<sub>3</sub>CN,<sup>2</sup> and  $m$  is the concentration of the paramagnetic sample in the outer tube in mol L<sup>-1</sup>.

In all the reactions MeOH and MeCN were HPLC grade, whereas ethanol and DCM were reagent grade and used without further purification. All reactions were conducted in air unless otherwise stated.

### *Experimental for the amine macrocycle HL<sup>aa</sup>*

**HL<sup>aa</sup>**: To a bright yellow solution of HL<sup>Et</sup> (254 mg, 0.857 mmol) in a mixture of ethanol (30 mL) and dichloromethane (5 mL) was slowly added small portions solid NaBH<sub>4</sub> (260 mg, 6.85 mmol, 8 equivalents) over a 10 minute period. The bright yellow solution slowly faded in colour and became cloudy over about 20 minutes after addition of NaBH<sub>4</sub>. The resulting mixture was stirred at room temperature for 48 hours. Acetone (10 mL) was added to the off-white cloudy mixture. The solvent was removed by rotary evaporation and the residue was extracted with RT chloroform (3 x 50 mL). The combined chloroform extracts were washed with water (3 x 20 mL), dried over MgSO<sub>4</sub> and the solvent removed, giving a pale yellow oil which upon drying *in vacuo* resulted in HL<sup>aa</sup> as an off-white crystalline solid (252 mg, 93%). (Found: C, 70.81; H, 8.41; N, 17.18%. Calc. for [C<sub>18</sub>H<sub>24</sub>N<sub>4</sub>•0.4EtOH•0.3H<sub>2</sub>O] (320.25 g mol<sup>-1</sup>): C, 70.51; H, 8.50; N, 17.49%). IR (ATR):  $\nu/\text{cm}^{-1} = 3275, 3256, 3216, 2838, 1599, 1580,$

1502, 1454, 1315, 1285, 1223, 1183, 1158, 1105, 1072, 1018, 979, 965, 940, 857, 840, 794, 742, 727, 646, 613, 593, 540, 466.  $^1\text{H}$  NMR (500 MHz,  $\text{CDCl}_3$ , 298 K):  $\delta/\text{ppm}$  = 2.10–1.70 (br, 3H, NHb/c/d), 2.71 (m, 4H, H9), 2.84 (m, 4H, H8), 3.79 (s, 4H, H7), 6.85 (apparent td,  $J$  = 7.4, 1.2 Hz, 2H, H4), 7.18 (m, 4H, H3/5), 7.28 (d,  $J$  = 8.1, 1.1 Hz, 2H, H6), 8.35 (s, 1H, NHa).  $^{13}\text{C}$  NMR (500 MHz,  $\text{CDCl}_3$ , 298 K):  $\delta/\text{ppm}$  = 48.05 (C9), 48.30 (C8), 53.02 (C7), 118.22 (C6), 120.19 (C4), 128.21 (C5), 128.66 (C2), 130.65 (C3), 143.63 (C1). ESI(+) MS ( $m/z$ ) (MeOH):  $[\text{C}_{18}\text{H}_{24}\text{N}_4+\text{H}]$  expected 297.2084, found 297.2074.

#### Experimental for the nickel(II) complexes

**$[\text{Ni}^{\text{II}}\text{L}^{\text{aa}}](\text{BF}_4)\cdot\text{H}_2\text{O}\cdot\text{DCM}$  (3):** To a pale yellow solution of  $\text{HL}^{\text{aa}}$  (71.3 mg, 0.241 mmol) in a mixture of dichloromethane (5 mL) and methanol (10 mL) was added a solution of nickel(II) tetrafluoroborate hexahydrate (81.9 mg, 0.241 mmol) in methanol (3 mL), causing an immediate change to dark blue in colour. To this solution was added triethylamine (24.3 mg, 0.241 mmol) in methanol (1 mL) resulting in a colour change from dark blue to dark green. The dark green solution was stirred at RT for 1 hour, concentrated to 20 mL under reduced pressure and subjected to diethyl ether vapour diffusion. After about 1-2 days the colour of the solution in the ether jar had turned dark red. After 2 days the resulting dark red/black solid was collected by filtration and dried *in vacuo* (98.3 mg, 75%). (Found: C, 42.19; H, 5.02; N, 10.01%. Calc. for  $[\text{C}_{18}\text{H}_{21}\text{N}_4\text{BF}_4\text{Ni}\cdot\text{H}_2\text{O}\cdot\text{DCM}]$  ( $541.83\text{ g mol}^{-1}$ ): C, 42.12; H, 4.65; N, 10.34%). ESI(+) MS ( $m/z$ ) (MeCN):  $[\text{Ni}^{\text{II}}\text{L}^{\text{aa}}-2\text{H}]^+$  expected 351.1118, found 351.1114. UV-vis (MeCN):  $\lambda_{\text{max}}/\text{nm}$  ( $\epsilon/\text{dm}^3\text{ mol}^{-1}\text{ cm}^{-1}$ ) = 364 (4379), 431 (4096), 970 (800).  $\mu$  (Gouy) = 0 BM.  $\mu$  (Evans in MeCN at 298 K) = 2.93 BM.  $\Lambda_{\text{m}}$  (MeCN) =  $159\text{ }\Omega^{-1}\text{ cm}^2\text{ mol}^{-1}$ .

**$\text{Ni}^{\text{II}}\text{L}^{\text{aa}}(\text{BF}_4)\cdot 2\text{H}_2\text{O}\cdot\text{DCM}$  (4):** Under an Ar atmosphere, to a pale yellow solution of  $\text{HL}^{\text{aa}}$  (68.4 mg, 0.231 mmol) in a 1:1 mixture of dichloromethane and acetonitrile (8 mL) was added a solution of nickel(II) tetrafluoroborate hexahydrate (78.6 mg, 0.231 mmol) in acetonitrile (2 mL), causing an immediate colour change to dark blue. To this solution was added triethylamine (23.4 mg, 0.231 mmol) in acetonitrile (1 mL) resulting in a dark green colour. This dark green solution was stirred at RT for 20 minutes, then diethyl ether (150 mL) was added resulting in the formation of a pale green precipitate which was filtered off under a constant flow of Ar and dried *in vacuo* (74 mg, 57%). (Found: C, 40.28; H, 5.31; N, 9.98%. Calc. for  $[\text{C}_{18}\text{H}_{23}\text{N}_4\text{BF}_4\text{Ni}\cdot 2\text{H}_2\text{O}\cdot\text{DCM}]$  ( $561.86\text{ g mol}^{-1}$ ): C, 40.62; H, 5.20; N, 9.97%. ESI(+) MS ( $m/z$ ):  $[\text{Ni}^{\text{II}}\text{L}^{\text{aa}}]^+$  expected 353.1271, found 353.1271. UV-vis (MeCN):  $\lambda_{\text{max}}/\text{nm}$  ( $\epsilon/\text{dm}^3\text{ mol}^{-1}\text{ cm}^{-1}$ ) = 452 (242), 524 (136), 872 (61).  $\mu$  (Evans in MeCN at 298 K) = 3.42 BM.  $\mu$  (PPMS at 300 K) = 3.50 BM.  $\Lambda_{\text{m}}$  (MeCN) =  $162\text{ }\Omega^{-1}\text{ cm}^2\text{ mol}^{-1}$ .

**$[\text{Ni}^{\text{II}}\text{HL}^{\text{aa}}(\text{NCS})_2]\cdot\text{CHCl}_3$  (5):** To a pale yellow solution of  $\text{HL}^{\text{aa}}$  (43.4 mg, 0.146 mmol) in chloroform (10 mL) in air was added solid nickel(II) thiocyanate (25.6 mg, 0.146 mmol), resulting in a pale green suspension. Acetonitrile (15 mL) was added to the suspension. The resulting suspension was stirred at RT for 2 days by which time it was much darker in colour. It was filtered, and the filtrate allowed to slowly evaporate, giving pale orange crystals which were collected by filtration and dried *in vacuo* (27 mg, 32 %). (Found: C, 43.12; H, 4.52; N, 14.62; S, 11.26%. Calc. for  $[\text{C}_{20}\text{H}_{24}\text{N}_6\text{S}_2\text{Ni}\cdot\text{CHCl}_3]$  ( $590.64\text{ g mol}^{-1}$ ): C, 42.70; H, 4.27; N, 14.23; S, 10.86%). ESI(+) MS ( $m/z$ ) (MeCN):  $[\text{Ni}^{\text{II}}\text{L}^{\text{aa}}-\text{H}]^+$  expected 353.1280, found 353.1271. UV-vis (MeCN):  $\lambda_{\text{max}}/\text{nm}$  ( $\epsilon/\text{dm}^3\text{ mol}^{-1}\text{ cm}^{-1}$ ) = 438 (546), 567 (129), 938 (27).  $\mu$  (Evans in MeCN at 298 K) = 3.25 BM.  $\mu$  (PPMS at 300 K) = 3.32 BM.  $\Lambda_{\text{m}}$  (MeCN) =  $88\text{ }\Omega^{-1}\text{ cm}^2\text{ mol}^{-1}$ .

Figure S1.  $^1\text{H}$  NMR and  $^{13}\text{C}$  NMR spectra of  $\text{HL}^{\text{aa}}$  in  $\text{CDCl}_3$ .

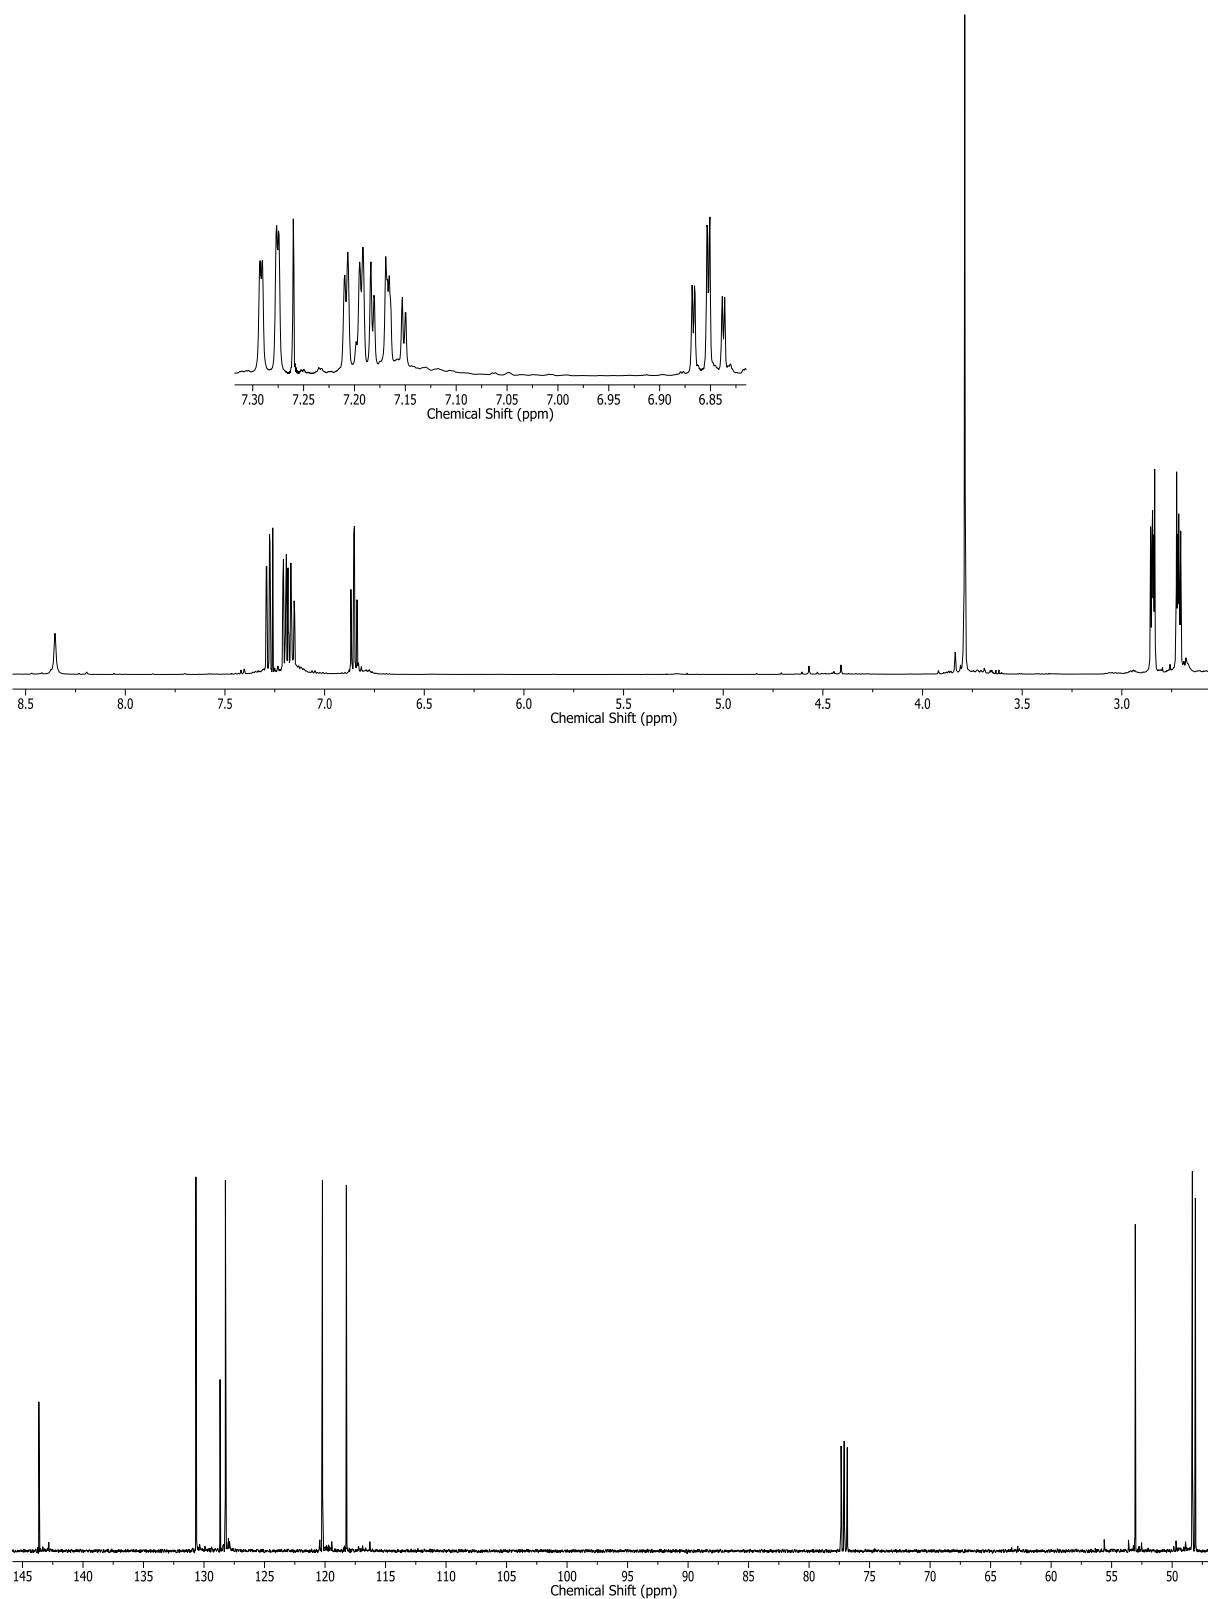

Figure S2. Evans method  $^1\text{H}$  NMR spectrum, obtained in a double walled NMR tube, for  $[\text{Ni}^{\text{II}}\text{L}^{\text{ia}}](\text{BF}_4)\cdot\text{H}_2\text{O}\cdot\text{DCM}$  (**3**) in  $\text{CD}_3\text{CN}$  (outer) vs. pure  $\text{CD}_3\text{CN}$  (inner).

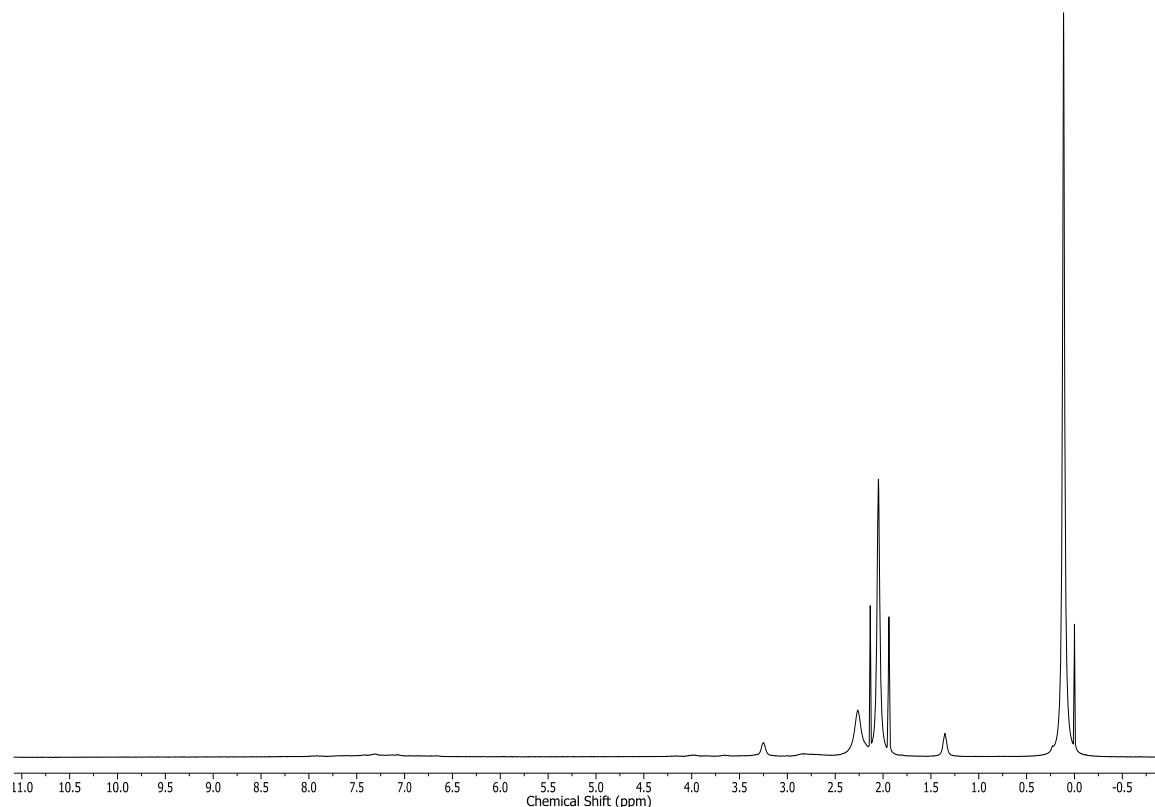

Calculation of magnetic moment from the shift of the acetonitrile peak in the NMR spectrum:

Mass = 2.565 mg; Volume = 0.7 mL;  $\chi_0 = -0.534 \times 10^{-6}$

$$\text{Concentration} = m = \frac{\text{mass}}{\text{MW} \times \text{Volume}} = \frac{2.565 \times 10^{-3}}{541.83 \times 0.0007} = 6.76 \times 10^{-3} \text{ mol L}^{-1}$$

$\text{CD}_3\text{CN}$  (inner tube) = 969.36 Hz

$\text{CD}_3\text{CN}$  (outer tube) = 1024.22 Hz

$$\Delta f = 1024.22 - 969.36 = 54.86; f = 5 \times 10^8 \text{ Hz}; m = \text{concentration} = 6.76 \times 10^{-3} \text{ mol L}^{-1}$$

$$\chi_g = \frac{3\Delta f}{2\pi f m} + \chi_0 = \frac{3 \times 54.86}{2 \times 3.14 \times 5 \times 10^8 \times 6.76 \times 10^{-3}} + (-0.534 \times 10^{-6}) = 7.22 \times 10^{-6} \text{ cm}^3 \text{ g}^{-1}$$

$$\chi_{mT} = \chi_g \times \text{MW of sample} = 7.22 \times 10^{-6} \times 541.83 = 3.91 \times 10^{-3} \text{ cm}^3 \text{ mol}^{-1}$$

$$\chi_{m20} = \chi_{mT} \times \left(\frac{T}{293}\right) = 3.91 \times 10^{-3} \times \left(\frac{291}{293}\right) = 3.89 \times 10^{-3} \text{ cm}^3 \text{ mol}^{-1}$$

$$\chi^{\text{corr}} = \chi_{m20} - \chi^{\text{dia}} = 3.89 \times 10^{-3} + 270.25 \times 10^{-6} = 4.16 \times 10^{-3} \text{ cm}^3 \text{ mol}^{-1}$$

$$\mu_{\text{eff}} = 2.83\sqrt{293 \times \chi_{\text{corr}}} = 2.83\sqrt{293 \times 4.16 \times 10^{-3}} = 3.12 \text{ BM}$$

Figure S3. Evans method  $^1\text{H}$  NMR spectrum, obtained in a double walled NMR tube, for  $[\text{Ni}^{\text{II}}\text{L}^{\text{aa}}](\text{BF}_4)\cdot 2\text{H}_2\text{O}\cdot \text{DCM}$  (**4**) in  $\text{CD}_3\text{CN}$  (outer) vs. pure  $\text{CD}_3\text{CN}$  (inner). Mass used: 3.296 mg;  $\text{CD}_3\text{CN}$  positions: 969.41 Hz (inner tube) and 1048.15 Hz (outer tube) so  $\mu_{\text{eff}} = 3.42 \text{ BM}$ .

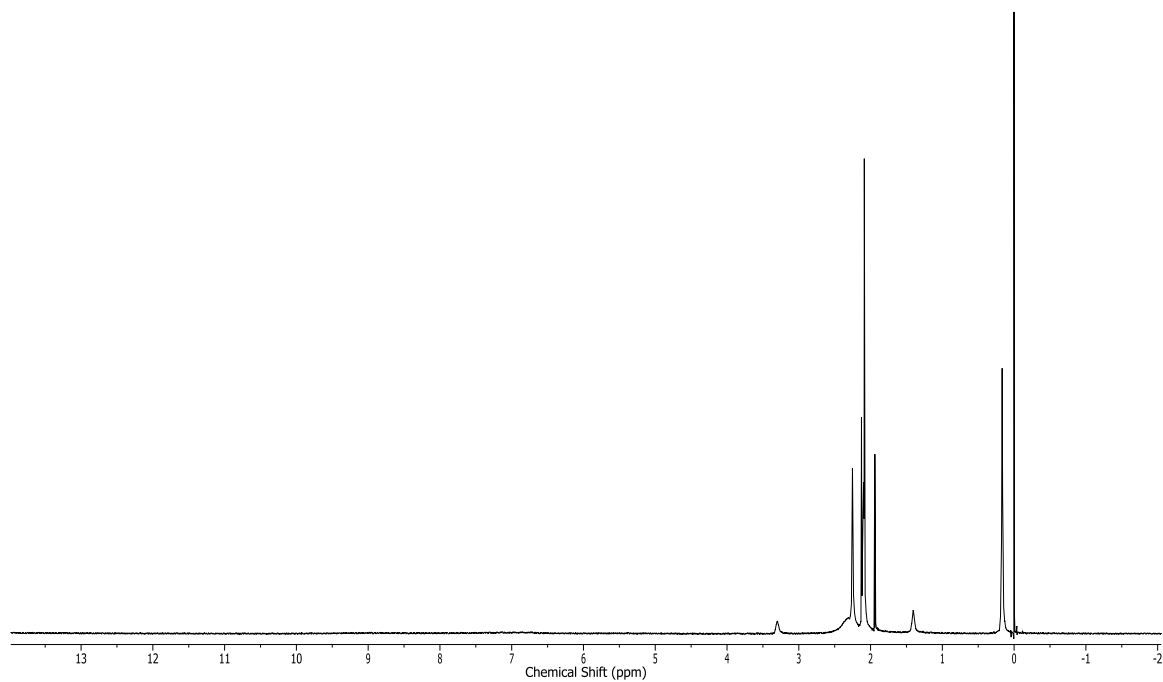

Figure S4. Evans method  $^1\text{H}$  NMR spectrum, obtained in a double walled NMR tube, for  $[\text{Ni}^{\text{II}}\text{HL}^{\text{aa}}(\text{NCS})_2]\cdot\text{CHCl}_3$  (**5**) in  $\text{CD}_3\text{CN}$  (outer) vs. pure  $\text{CD}_3\text{CN}$  (inner). Mass used: 2.936 mg;  $\text{CD}_3\text{CN}$  positions: 969.36 Hz (inner tube) and 1026.69 Hz (outer tube) so  $\mu_{\text{eff}} = 3.25$  BM.

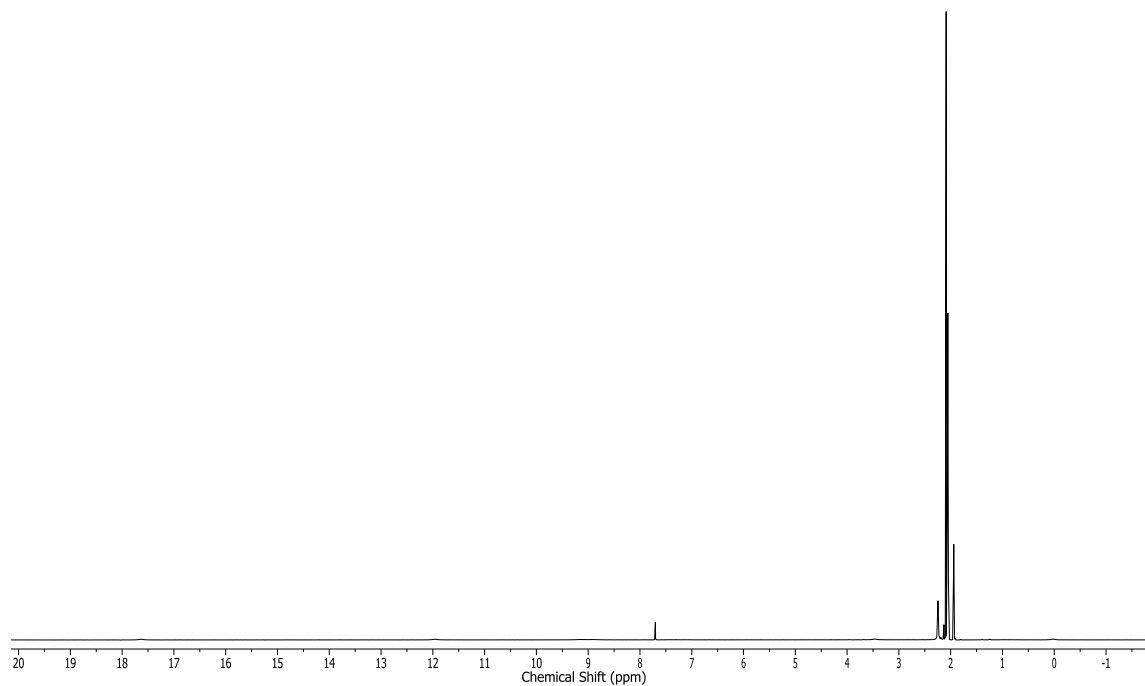

Figure S5.  $^1\text{H}$  NMR spectrum of  $[\text{Ni}^{\text{II}}\text{L}^{\text{Et}}](\text{BF}_4)\cdot\text{H}_2\text{O}$  (**2**) in  $\text{CD}_3\text{CN}$  (400 MHz) **before** addition of a drop of pyridine.

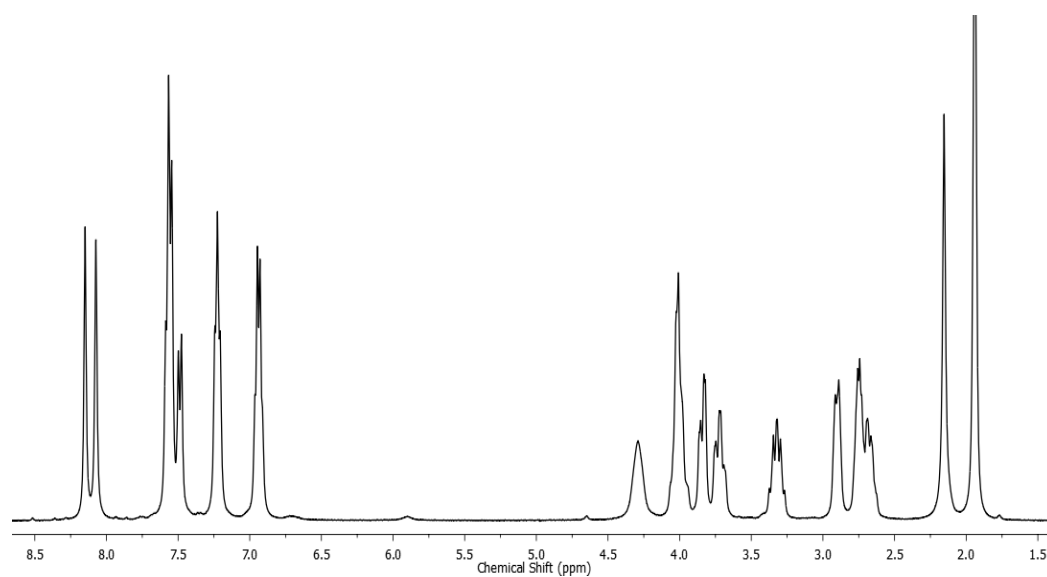

Figure S6.  $^1\text{H}$  NMR spectrum of  $[\text{Ni}^{\text{II}}\text{L}^{\text{Et}}](\text{BF}_4)\cdot\text{H}_2\text{O}$  (**2**) in  $\text{CD}_3\text{CN}$  (400 MHz) **after** addition of a drop of pyridine.

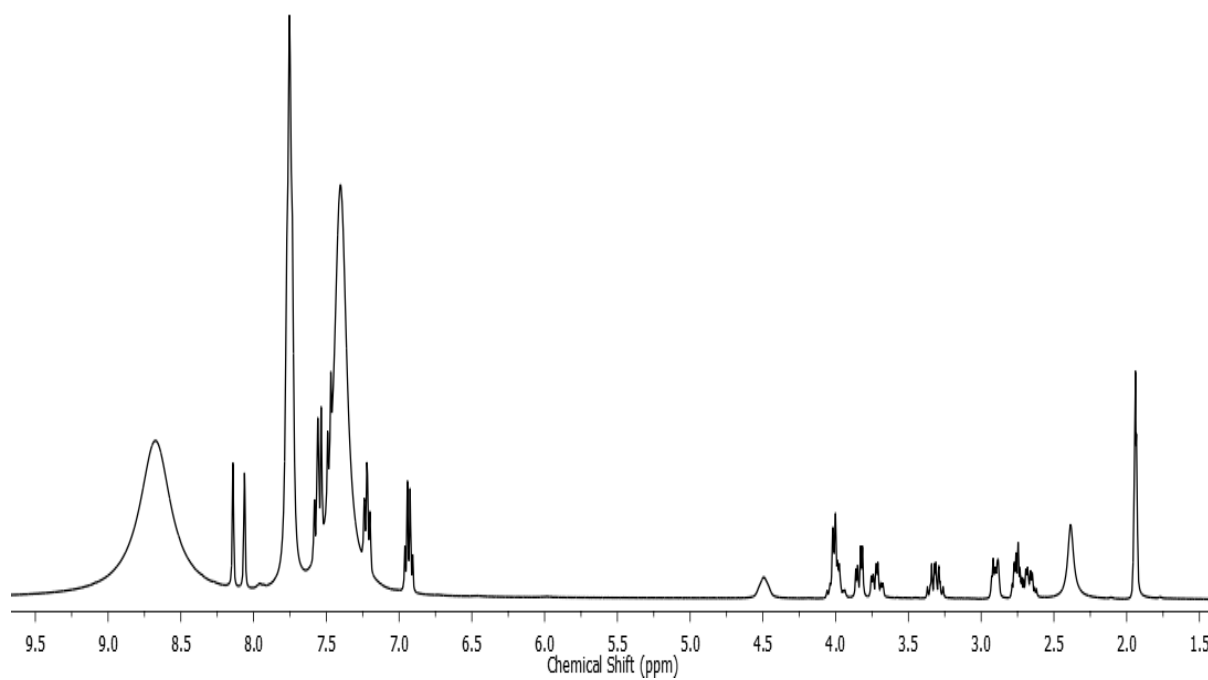



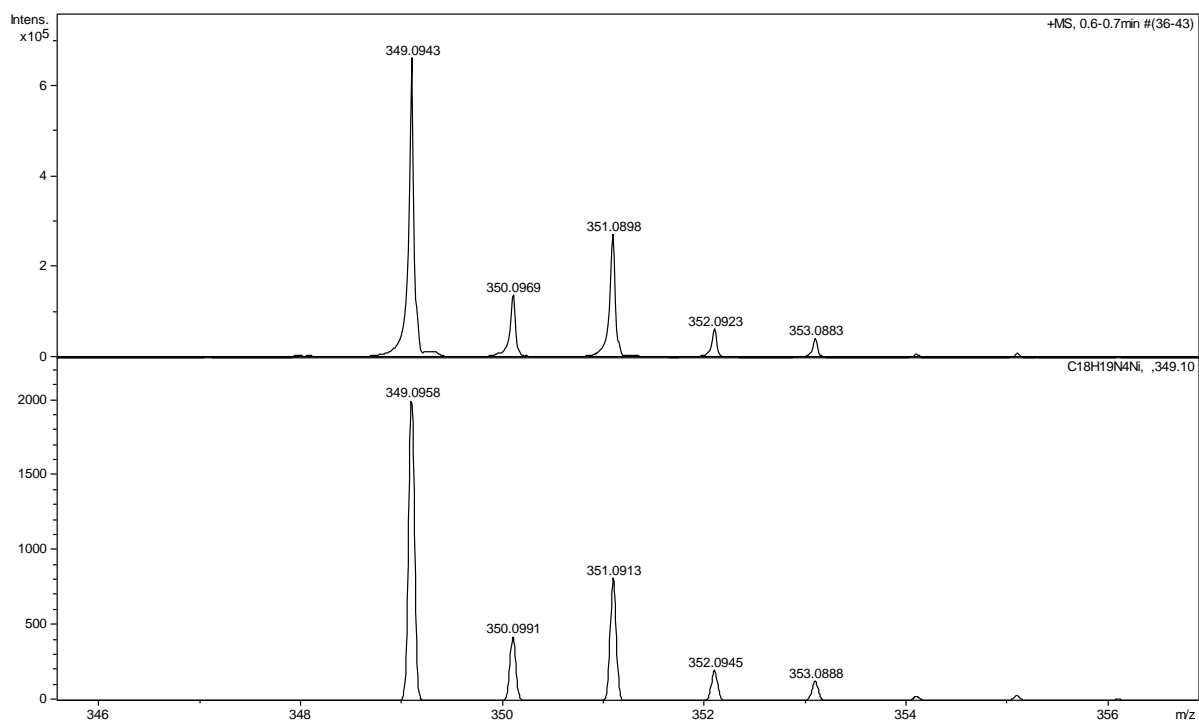

Figure S7. The observed (top) and simulated (bottom) positive ion mass spectrum pattern for the  $[\text{Ni}^{\text{II}}\text{L}^{\text{aa}}-4\text{H}]^+ = [\text{Ni}^{\text{II}}\text{L}^{\text{Et}}]^+$  moiety of  $[\text{Ni}^{\text{II}}\text{L}^{\text{Et}}](\text{BF}_4) \cdot \text{H}_2\text{O}$  (**2**).

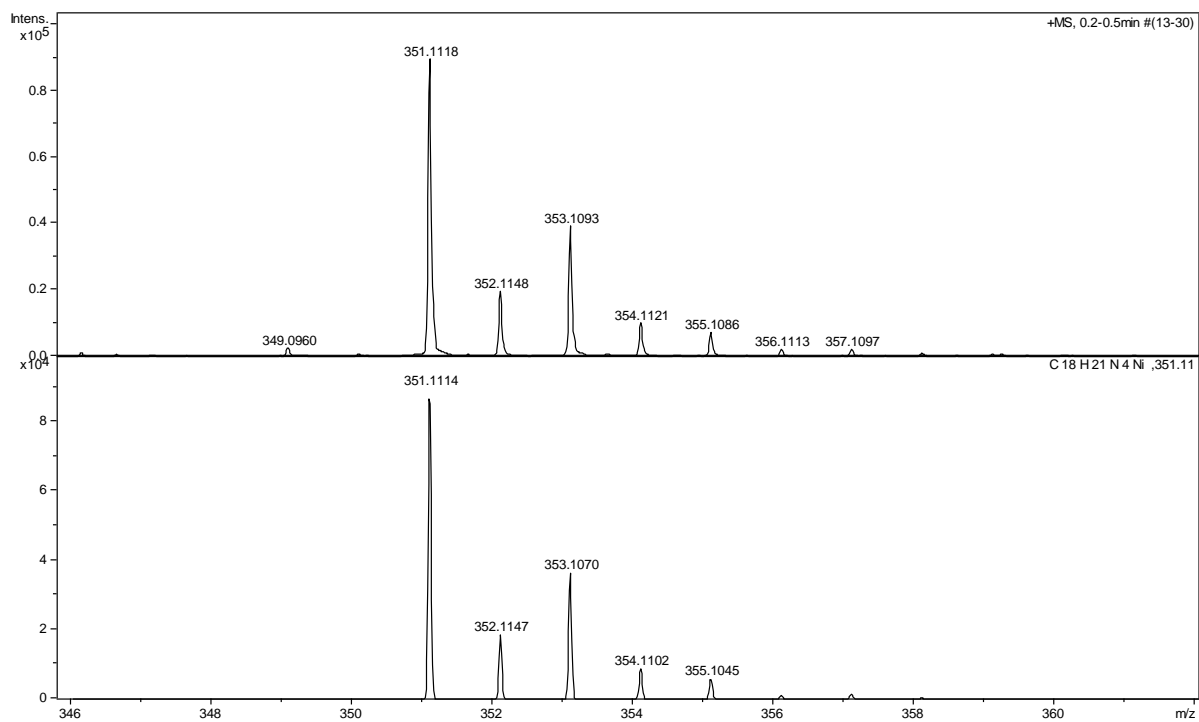

Figure S8. The observed (top) and simulated (bottom) positive ion mass spectrum pattern for the  $[\text{Ni}^{\text{II}}\text{L}^{\text{aa}}-2\text{H}]^+ = [\text{Ni}^{\text{II}}\text{L}^{\text{ia}}]^+$  moiety of  $[\text{Ni}^{\text{II}}\text{L}^{\text{ia}}](\text{BF}_4) \cdot \text{H}_2\text{O} \cdot \text{DCM}$  (**3**).

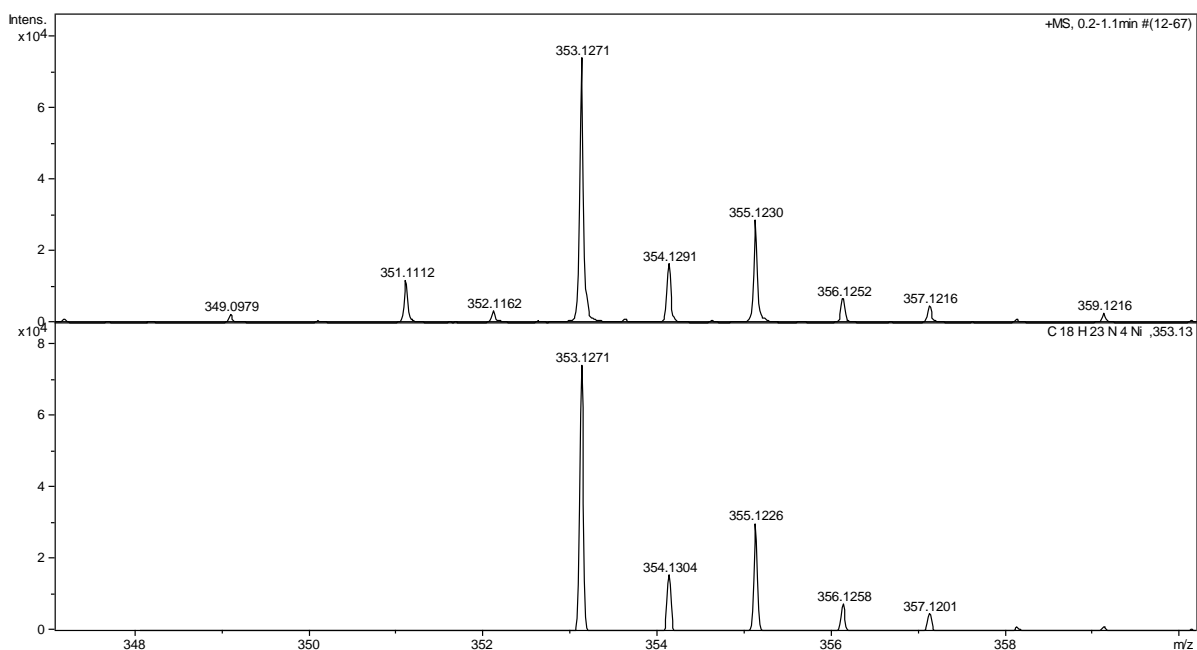

Figure S9. The observed (top) and simulated (bottom) positive ion mass spectrum pattern for the  $[\text{Ni}^{\text{II}}\text{L}^{\text{aa}}]^+$  moiety in  $[\text{Ni}^{\text{II}}\text{L}^{\text{aa}}](\text{BF}_4) \cdot 2\text{H}_2\text{O} \cdot \text{DCM}$  (**4**).

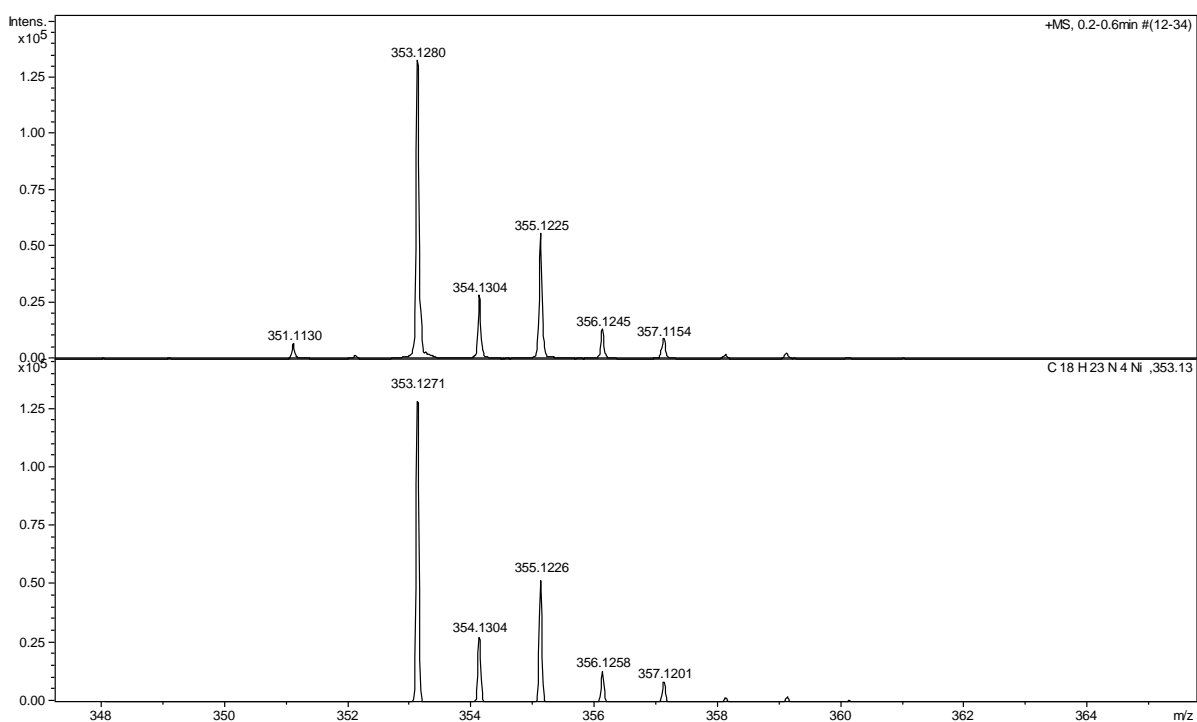

Figure S10. The observed (top) and simulated (bottom) positive ion mass spectrum pattern for the  $[\text{Ni}^{\text{II}}\text{L}^{\text{aa}}-\text{H}]^+$  moiety of  $[\text{Ni}^{\text{II}}\text{HL}^{\text{aa}}(\text{NCS})_2] \cdot \text{CHCl}_3$  (**5**).

Table S1. Crystal structure determination details for the complexes,  $[\text{Ni}^{\text{II}}\text{L}^{\text{Et}}](\text{BF}_4)$  (**2**),  $[\text{Ni}^{\text{II}}\text{L}^{\text{ia}}](\text{BF}_4)$  (**3**), and  $[\text{Ni}^{\text{II}}\text{HL}^{\text{aa}}(\text{NCS})_2] \cdot 0.3\text{DCM} \cdot 0.15\text{MeOH} \cdot 0.15\text{H}_2\text{O}$  (**5**).

|                                             | $[\text{Ni}^{\text{II}}\text{L}^{\text{Et}}](\text{BF}_4)$ | $[\text{Ni}^{\text{II}}\text{L}^{\text{ia}}](\text{BF}_4)$ | $[\text{Ni}^{\text{II}}\text{HL}^{\text{aa}}(\text{NCS})_2] \cdot 0.3\text{DCM} \cdot 0.15\text{MeOH} \cdot 0.15\text{H}_2\text{O}$ |
|---------------------------------------------|------------------------------------------------------------|------------------------------------------------------------|-------------------------------------------------------------------------------------------------------------------------------------|
| Empirical formula                           | $\text{C}_{18}\text{H}_{19}\text{N}_4\text{BF}_4\text{Ni}$ | $\text{C}_{18}\text{H}_{21}\text{N}_4\text{BF}_4\text{Ni}$ | $\text{C}_{20.45}\text{H}_{25.20}\text{Cl}_{0.60}\text{N}_6\text{NiO}_{0.30}\text{S}_2$                                             |
| $M_r$                                       | 436.89                                                     | 438.91                                                     | 503.97                                                                                                                              |
| Crystal system                              | Monoclinic                                                 | Monoclinic                                                 | Monoclinic                                                                                                                          |
| Space group                                 | $\text{P}_n$                                               | $\text{P2}_1/\text{c}$                                     | $\text{P2}_1/\text{c}$                                                                                                              |
| $a$ [Å]                                     | 7.2737(15)                                                 | 9.8702(4)                                                  | 13.7811(9)                                                                                                                          |
| $b$ [Å]                                     | 10.6471(18)                                                | 18.1530(8)                                                 | 20.5066(14)                                                                                                                         |
| $c$ [Å]                                     | 11.3778(15)                                                | 11.2583(4)                                                 | 9.1197(5)                                                                                                                           |
| $\alpha$ [°]                                | 90                                                         | 90                                                         | 90                                                                                                                                  |
| $\beta$ [°]                                 | 94.181(3)                                                  | 115.560(1)                                                 | 106.797(2)                                                                                                                          |
| $\gamma$ [°]                                | 90                                                         | 90                                                         | 90                                                                                                                                  |
| $V$ [Å <sup>3</sup> ]                       | 878.8(3)                                                   | 1819.8(2)                                                  | 2467.3(3)                                                                                                                           |
| $Z$                                         | 2                                                          | 4                                                          | 4                                                                                                                                   |
| $T$ [K]                                     | 90(2)                                                      | 90(2)                                                      | 91(2)                                                                                                                               |
| $\rho_{\text{calcd.}}$ [gcm <sup>-3</sup> ] | 1.651                                                      | 1.602                                                      | 1.357                                                                                                                               |
| $\mu$ [mm <sup>-1</sup> ]                   | 1.156                                                      | 1.117                                                      | 1.041                                                                                                                               |
| $F(000)$                                    | 448                                                        | 904                                                        | 1050                                                                                                                                |
| Crystal size [mm]                           | 0.20 x 0.10 x 0.08                                         | 0.50 x 0.39 x 0.37                                         | 0.26 x 0.24 x 0.13                                                                                                                  |
| $\Theta$ range for data collection [°]      | 1.79 to 26.02                                              | 2.29 to 26.11                                              | 2.54 to 26.37                                                                                                                       |
| Reflections collected                       | 11732                                                      | 12160                                                      | 18695                                                                                                                               |
| Independent reflections                     | 3339                                                       | 3496                                                       | 4882                                                                                                                                |
| $R(\text{int})$                             | 0.0574                                                     | 0.0342                                                     | 0.0435                                                                                                                              |
| Max. and min. transmission                  | 0.9132 and 0.6614                                          | 0.6827 and 0.6051                                          | 0.8766 and 0.7736                                                                                                                   |
| Data/ restraints/ parameters                | 3339 / 2 / 257                                             | 3496 / 0 / 261                                             | 4882 / 2 / 302                                                                                                                      |
| Goof ( $F^2$ )                              | 1.014                                                      | 1.043                                                      | 1.061                                                                                                                               |
| $R_1$ [ $I > 2\sigma(I)$ ]                  | 0.0504                                                     | 0.0322                                                     | 0.0494                                                                                                                              |
| $wR_2$ [all data]                           | 0.1169                                                     | 0.0772                                                     | 0.1579                                                                                                                              |

## References

1. D. F. Evans, *J. Chem. Soc.*, 1959, 2003-2005.
2. R. C. Weast, M. J. Astle and W. H. Beyer, *CRC Handbook of Chemistry and Physics*, 64 edn., CRC Press, 1983.
